# Supplementary material for: From waste to wearable: an alternative waste stream for unusable textiles turned into piezoelectric textiles
Source: Royal Society of Chemistry journal article supplement (doi:10.1039/d2su00068g), 2023-01-01
Supplement: d2su00068g2.pdf [file d2su00068g2.pdf]

## Supplementary Information

### From waste to wearable: an alternative waste stream for unusable textiles turned into piezoelectric textiles

JoAnna Milam-Guerrero,<sup>a</sup> Dong-Jun Kwon,<sup>b</sup> Yun-Young Choi,<sup>a</sup> Faraj Al-badani,<sup>a</sup> Jizhou Jiang,<sup>a</sup> Jennifer Schaefer,<sup>a</sup> Nosang V. Myung<sup>a\*</sup>

<sup>a</sup> Department of Chemical and Biomolecular Engineering, University of Notre Dame, Notre Dame, IN 46530, United States

<sup>b</sup> Research Institute for Green Energy Convergence Technology (RIGET), Gyeongsang National University, Jinju 52828, Republic of Korea

\* Corresponding author: E-mail: nmyung@nd.edu

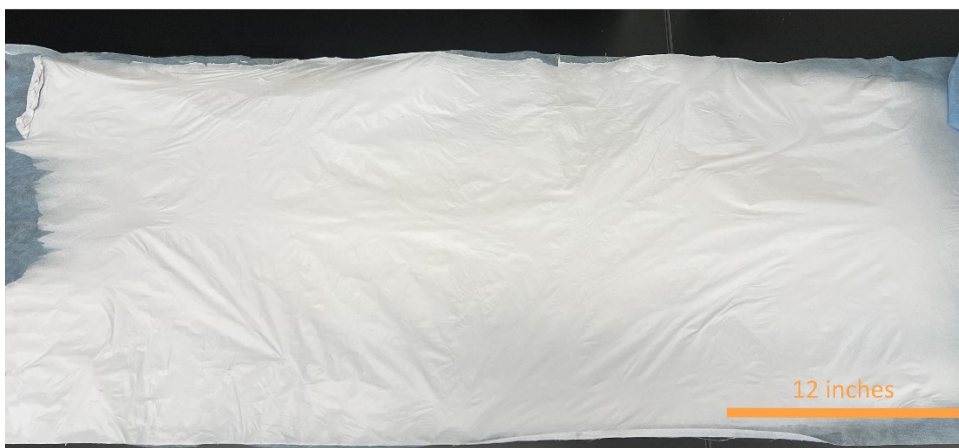

*SI Figure 1. A sample bolt of electrospun, piezoelectric nanofiber material (white) using a production scale Nanospider (needleless) system.*

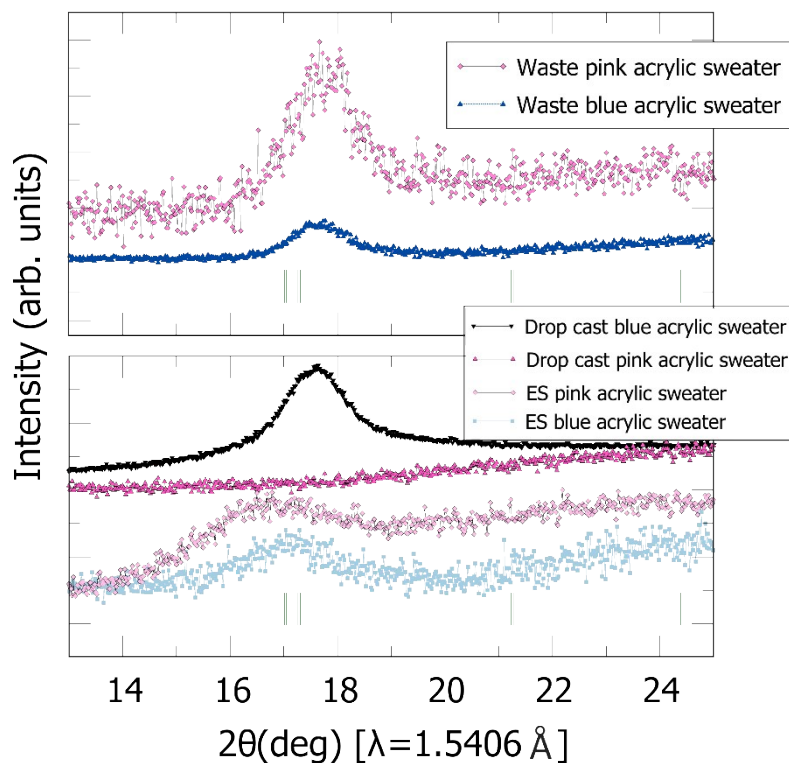

SI Figure 2. XRD data of all studied acrylic samples before and after processing. Green vertical tick marks are indexed crystallographic reflections.

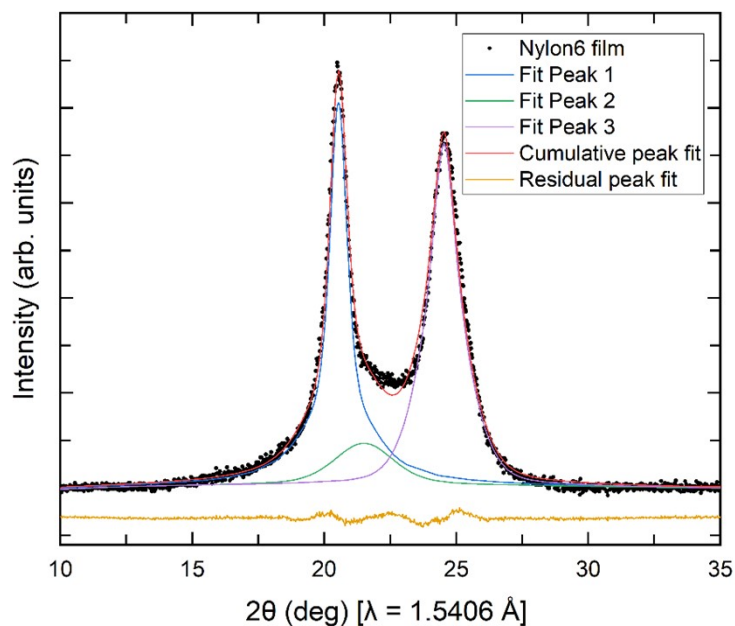

SI Figure 3. An example of the peak fitting conditions used to quantify the phases present in all samples analyzed. Raw data is represented as black dots, fit peaks as blue, green, and purple lines, and the cumulative fit as a red line. The difference line is indicated with a yellow low. Known phase peaks were fit using a Pseudo Voigt 2 profile and amorphous peaks were fit using a Gaussian profile.

Table 1. XRD peak analysis results from peak deconvolution.

| Sample               |                                  | 2 $\theta$ | Area (%) | Reflection     |
|----------------------|----------------------------------|------------|----------|----------------|
| <b>Acrylonitrile</b> | Waste acrylic sweater (blue)     | 17.675     | 23.490   | (100)          |
|                      | ES acrylic sweater (blue)        | 17.082     | 16.151   | (100)          |
|                      | Drop cast acrylic sweater (blue) | 17.672     | 45.764   | (100)          |
|                      | Waste acrylic sweater (pink)     | 17.748     | 80.729   | (100)          |
|                      | ES acrylic sweater (pink)        | 16.634     | 6.104    | (100)          |
|                      | Drop cast acrylic sweater (pink) | 15.974     | 2.112    | (100)          |
| <b>Nylon</b>         | Waste Nylon raincoat             | 20.323     | 28.019   | $\alpha$ (200) |
|                      |                                  | 21.437     | 12.951   | $\gamma$ (001) |
|                      |                                  | 23.659     | 59.029   | $\alpha$ (010) |
|                      | ES Nylon raincoat                | 21.731     | 5.609    | $\alpha$ (200) |
|                      |                                  | 22.202     | 77.105   | $\gamma$ (001) |
|                      |                                  | 24.039     | 17.285   | $\alpha$ (010) |
|                      | Drop cast Nylon raincoat         | 20.388     | 61.025   | $\alpha$ (200) |
|                      |                                  | 22.004     | 7.227    | $\gamma$ (001) |
|                      |                                  | 24.459     | 31.747   | $\alpha$ (010) |

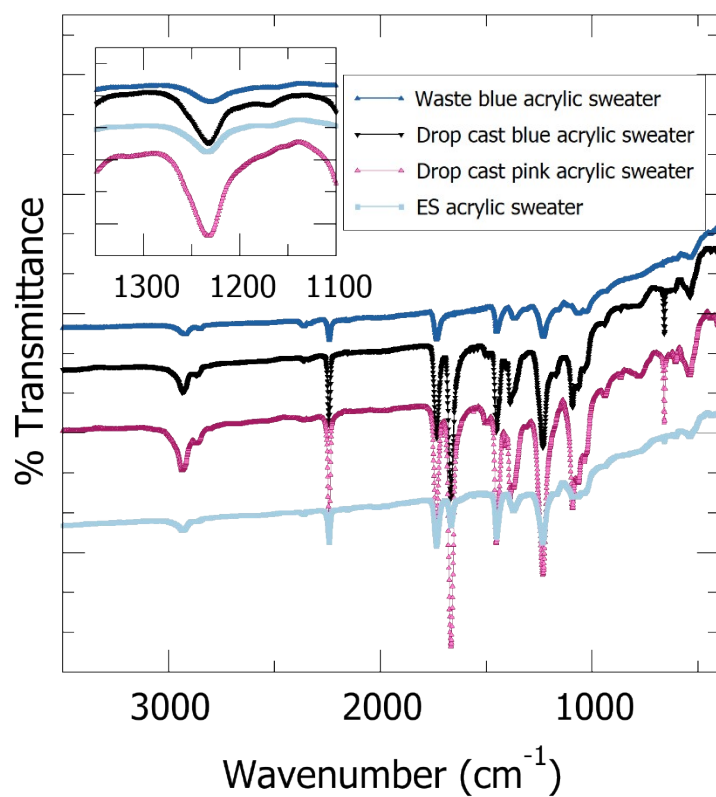

SI Figure 4. FTIR data of all acrylic samples analyzed with the area used (inset) to quantify the present phases.

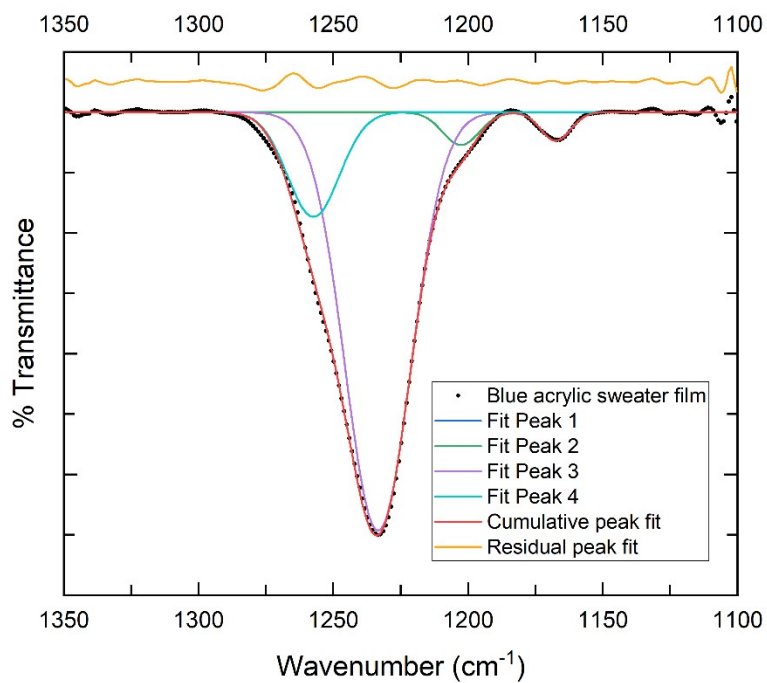

SI Figure 5. An example of the peak fitting used to quantify the present phases of each material.

Table 2. FTIR peak analysis results obtained from the peak deconvolution performed on each material.

| Sample        |                                  | Wavenumber<br>(cm <sup>-1</sup> ) | Area<br>(%) | Assigned<br>phase      |
|---------------|----------------------------------|-----------------------------------|-------------|------------------------|
| Acrylonitrile | Waste acrylic sweater (blue)     | 1232                              | 94.7        | 3 <sup>1</sup> helical |
|               |                                  | 1235                              | 89.4        | 3 <sup>1</sup> helical |
|               | ES acrylic sweater (blue)        | 1262                              | 6.8         | Zig zag                |
|               |                                  | 1233                              | 78.8        | 3 <sup>1</sup> helical |
|               | Drop cast acrylic sweater (blue) | 1257                              | 15.4        | Zig zag                |
|               |                                  | 1235                              | 77.8        | 3 <sup>1</sup> helical |
|               | ES acrylic sweater (pink)        | 1258                              | 11.1        | Zig zag                |
|               |                                  | 1231                              | 43.8        | 3 <sup>1</sup> helical |
|               | Drop cast acrylic sweater (pink) | 1250                              | 27.2        | Zig zag                |
|               |                                  | 927                               | 27.3        | $\alpha$               |
| Nylon         | Waste Nylon raincoat             | 972                               | 26.9        | $\gamma$               |
|               |                                  | 929                               | 3.5         | $\alpha$               |
|               | ES Nylon raincoat                | 974                               | 50.6        | $\gamma$               |
|               |                                  | 928                               | 45.4        | $\alpha$               |
|               | Drop cast Nylon raincoat         | --                                | --          | $\gamma$               |
|               |                                  |                                   |             |                        |

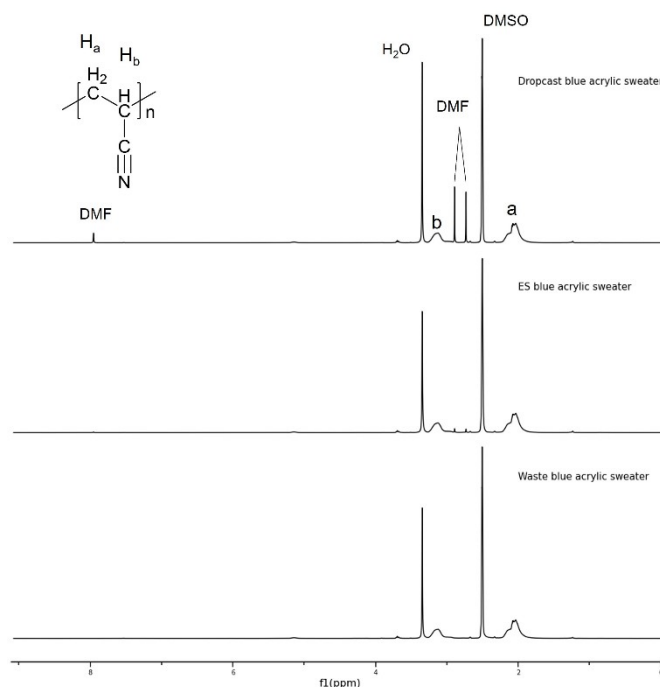

SI Figure 6.  $^1\text{H}$ -NMR data of the blue acrylic sweater samples. The broad peaks around 2 and 3.2 ppm indicate a polymerized sample associated with PAN. Additional sharp peaks were assigned to the solvents used in either sample preparation or sample synthesis.

Table 3. Results of the linearly fit cantilever data of each material.

| Sample       |                                  | Linear equation       | Correlation coefficient |
|--------------|----------------------------------|-----------------------|-------------------------|
| <b>PAN</b>   | Waste acrylic sweater (blue)     | $y = 374x - 98.22$    | 0.980                   |
|              | ES acrylic sweater (blue)        | $y = 30395x - 827.56$ | 0.935                   |
|              | Drop cast acrylic sweater (blue) | $y = 3189x - 17.33$   | 0.992                   |
|              | Waste acrylic sweater (pink)     | $y = 178x - 69.69$    | 0.892                   |
|              | ES acrylic sweater (pink)        | $y = 10263x - 115.00$ | 0.756                   |
|              | Drop cast acrylic sweater (pink) | $y = 3880x - 8.02$    | 0.958                   |
| <b>Nylon</b> | Waste Nylon raincoat             | $y = 3749x - 7.96$    | 0.921                   |
|              | ES Nylon raincoat                | $y = 26835x - 198.34$ | 0.971                   |
|              | Drop cast Nylon raincoat         | $y = 3473x - 79.39$   | 0.864                   |

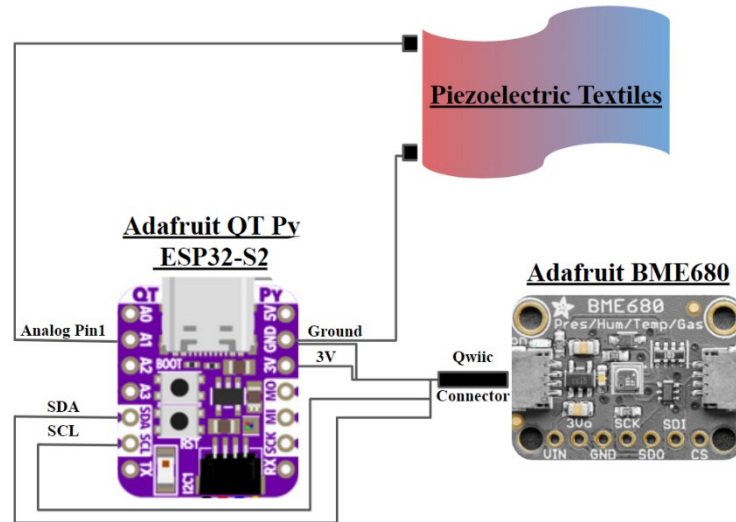

SI Figure 7. Block diagram of the electronic textile and gas sensors.

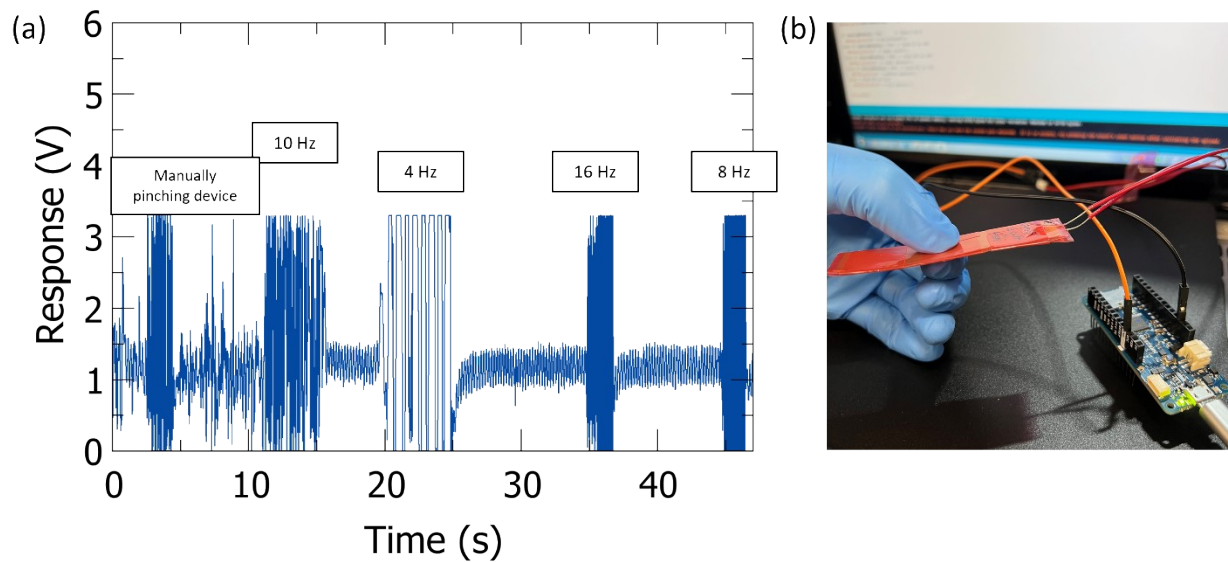

SI Figure 8. (a) Preliminary pressure sensor responses as a function of either manual pinching or specific frequency excitation using the cantilever device. (b) Image of an electrospun blue acrylic sweater device connected to the MKR Arduino device for sensor output measurements.
